# Supplementary material for: Brain-inspired Predictive Coding Improves the Performance of Machine Challenging Tasks
Source: Frontiers journal article supplement (doi:10.3389/fncom.2022.1062678), 2022-11-16
Supplement: Data_Sheet_1.PDF [file Data_Sheet_1.PDF]

# ***Brain-inspired Predictive Coding Improves the Performance of Machine Challenging Tasks***

## **1 COMPARISON METHODS FOR INCREMENTAL LEARNING**

We provide a brief introduction to the learning algorithms we utilized.

### **1.1 SGD**

We trained each task with pre-defined order using stochastic gradient descent (SGD) (Ruder, 2016). We denoted an approach that froze the parameters except for that of the last layer as SGD-F.

### **1.2 EWC**

To combat the catastrophic forgetting, Kirkpatrick et al. (2017) introduced Elastic Weight Consolidation (EWC) algorithm as a regularization approach. It helps for the posterior probability to maintain the important parameters for the previously learned tasks and jointly preserve the ability to learn new tasks.

### **1.3 IMM**

Lee et al. (2017) introduced a method, called incremental moment matching (IMM) to resolve catastrophic forgetting. To approximate the posterior distribution of parameters, IMM utilizes a Gaussian distribution for each task. The goal of IMM is to investigate for the optimal parameters of the Gaussian approximation and it is categorized into two algorithms. First, IMM-MEAN calculates the weighted average of two networks by minimizing the local KL-divergence. While IMM-MODE focuses on the searching the mode that maximizes the posterior.

### **1.4 LFL**

Jung et al. (2016) proposed a less-forgetting method to alleviate catastrophic forgetting. By constructing source and target networks, the goal of LFL minimize the discrepancy between the feature vectors of from two networks.

### **1.5 LWF**

Li and Hoiem (2017) designed a less forgettable architecture in incremental learning. The architecture is constructed with multiple output layers where each layer is appended when the network learns a new task. To effectively maintain information from previously learned, LWF utilizes knowledge distillation loss.

## **2 COMPARISON METHODS FOR CLASS-IMBALANCED LEARNING**

We provide a brief introduction to the learning objectives we utilized.

### **2.1 Cross-Entropy Loss**

The most common criterion used for classification tasks. Inspired from the information theory, the goal of cross-entropy loss is to make the probability distribution be as close as possible to the target distribution.

## 2.2 Mixup

Mixup (Zhang et al., 2017) generates synthetic training examples via linear interpolation as follows:  $\tilde{x} = \lambda x_i + (1 - \lambda)x_j$ , and  $\tilde{y} = \lambda y_i + (1 - \lambda)y_j$ , where  $(x_i, y_i)$  and  $(x_j, y_j)$  are two training examples, and  $\lambda \in [0, 1]$  is the mixing coefficient. It is demonstrated that the training with virtual examples enhances the performance of classification and increases the robustness of networks.

## 2.3 Focal Loss

As a representative technique for skewed data distribution, focal loss (Lin et al., 2017) is designed when the object detector encountered class imbalance. It is implemented by multiplying a re-weighting factor  $\alpha(1 - p)^\gamma$  on the cross-entropy loss where  $\alpha$  indicates the class-wise weight.

## 2.4 Class-Balanced Focal Loss

Class-balanced loss (Cui et al., 2019) considers the effective number of samples to adjust the decision boundary by inverse class frequency. The effective number for each class is defined as  $E_n = \frac{1-\beta^n}{1-\beta}$  and it is multiplied by the cross-entropy loss.

## 2.5 Label Distribution Aware Margin Loss

Cao et al. (2019) proposed a loss function that adjusts the decision boundary of which a class having a small number of samples has a wider margin to effectively handle the imbalanced data and a re-balancing scheduler for the efficient optimization of the re-weighting strategy.

## 2.6 Balanced Meta-SoftMax Loss

Ren et al. (2020) focused on the distribution mismatch between training and testing dataset, and propose a balanced softmax. However, due to the property of mini-batch training, the balanced softmax does not showed successful performance due to the over-balance problem. To resolve this problem, Ren et al. (2020) introduced a meta sampler which is a trainable version of a class-balanced sampler.

## REFERENCES

- Cao, K., Wei, C., Gaidon, A., Arechiga, N., and Ma, T. (2019). Learning imbalanced datasets with label-distribution-aware margin loss. *Advances in neural information processing systems* 32
- Cui, Y., Jia, M., Lin, T.-Y., Song, Y., and Belongie, S. (2019). Class-balanced loss based on effective number of samples. In *Proceedings of the IEEE/CVF conference on computer vision and pattern recognition*. 9268–9277
- Jung, H., Ju, J., Jung, M., and Kim, J. (2016). Less-forgetting learning in deep neural networks. *arXiv preprint arXiv:1607.00122*
- Kirkpatrick, J., Pascanu, R., Rabinowitz, N., Veness, J., Desjardins, G., Rusu, A. A., et al. (2017). Overcoming catastrophic forgetting in neural networks. *Proceedings of the national academy of sciences* 114, 3521–3526
- Lee, S.-W., Kim, J.-H., Jun, J., Ha, J.-W., and Zhang, B.-T. (2017). Overcoming catastrophic forgetting by incremental moment matching. *Advances in neural information processing systems* 30
- Li, Z. and Hoiem, D. (2017). Learning without forgetting. *IEEE transactions on pattern analysis and machine intelligence* 40, 2935–2947
- Lin, T.-Y., Goyal, P., Girshick, R., He, K., and Dollár, P. (2017). Focal loss for dense object detection. In *Proceedings of the IEEE international conference on computer vision*. 2980–2988

- Ren, J., Yu, C., Ma, X., Zhao, H., Yi, S., et al. (2020). Balanced meta-softmax for long-tailed visual recognition. *Advances in neural information processing systems* 33, 4175–4186
- Ruder, S. (2016). An overview of gradient descent optimization algorithms. *arXiv preprint arXiv:1609.04747*
- Zhang, H., Cisse, M., Dauphin, Y. N., and Lopez-Paz, D. (2017). mixup: Beyond empirical risk minimization. *arXiv preprint arXiv:1710.09412*
